# Supplementary material for: Basic Regulatory Principles of Escherichia coli's Electron Transport Chain for Varying Oxygen Conditions
Source: PLOS journal article supplement (doi:10.1371/journal.pone.0107640), 2014-09-30
Supplement: S2 (10.1371/journal.pone.0107640.s002) [file journal.pone.0107640.s002.pdf]

## Determination of parameter values using measurement data

- $Y_{0\%}$  and  $Y_{100\%}$ :

The parameters  $Y_{0\%}$  and  $Y_{100\%}$ , describing the glucose-biomass yield at 0 % and 100 % aerobiosis respectively, can be calculated from known glucose input and resulting steady state biomass for the anaerobic and aerobic case:

$$Y_{0\%} = \frac{D}{v_{\text{Glc}}(0\%)} \approx \frac{c_x(0\%)}{c_{\text{in,Glc}}}$$

$$Y_{100\%} = \frac{D}{v_{\text{Glc}}(100\%)} \approx \frac{c_x(100\%)}{c_{\text{in,Glc}}}$$

These values equal to  $Y_{0\%} = 0.02 \text{ g}_{\text{DCW}} \cdot \text{mmol}_{\text{Glc}}^{-1}$  and  $Y_{100\%} = 0.07 \text{ g}_{\text{DCW}} \cdot \text{mmol}_{\text{Glc}}^{-1}$ .

- $X_\mu$ :

The parameter  $X_\mu$  describing the proportion of electron pairs for forming biomass can be calculated from the state equation for  $c_{\text{e}_2\text{H}_2}$  using steady state measurement data and  $v_{\text{Oxi}} = v_{\text{Dh}}$ . Here we present the solution for the anaerobic and aerobic case only:

anaerobic:

$$0 = 12 \cdot v_{\text{Glc}}(0\%) - X_\mu \cdot \mu - v_{\text{Ferm}}(0\%)$$

$$X_\mu = \frac{12 \cdot v_{\text{Glc}}(0\%) - v_{\text{Ferm}}(0\%)}{D}$$

$$= \frac{12}{Y_{0\%}} - \frac{v_{\text{Ferm}}(0\%)}{D}$$

aerobic:

$$0 = 12 \cdot v_{\text{Glc}}(100\%) - X_\mu \cdot \mu - v_{\text{Oxi}}(100\%)$$

$$X_\mu = \frac{12 \cdot v_{\text{Glc}}(100\%) - v_{\text{Oxi}}(100\%)}{D}$$

$$= \frac{12}{Y_{100\%}} - \frac{v_{\text{Oxi}}(100\%)}{D}$$

The calculated values were used for defining the lower and upper parameter bound for parameter identification. They result in  $88.8 \text{ mmol}_{\text{e}_2\text{H}_2} \cdot \text{g}_{\text{DCW}}^{-1}$  and  $112.8 \text{ mmol}_{\text{e}_2\text{H}_2} \cdot \text{g}_{\text{DCW}}^{-1}$ , respectively.

- $v_{\text{in,O}_2,100\%}$ :

The parameter  $v_{\text{in,O}_2,100\%}$  can be calculated using steady state data of biomass and oxygen uptake rate at 100 % aerobiosis:

$$v_{\text{in,O}_2,100\%} = 0.5 \cdot v_{\text{Oxi}}(100\%) \cdot c_x(100\%)$$

The value is different for the two experimental conditions resulting in values of  $18.28 \text{ mM}_{\text{O}_2} \cdot \text{h}^{-1}$  for “ExpA” and  $10.84 \text{ mM}_{\text{O}_2} \cdot \text{h}^{-1}$  for “ExpB”, respectively.

- $p_{\text{Glc}}$ :

This parameter can be calculated from the oxygen and glucose uptake. Indeed, in that way this parameter evaluated at 100 % aerobiosis ( $\lambda_Y = 1$ ) is related to  $v_{\text{in,O}_2,100\%}$ :

$$p_{\text{Glc}} = \frac{v_{\text{Oxi}}(100\%)}{v_{\text{Glc}}(100\%)} = \frac{v_{\text{Oxi}}(100\%) \cdot c_x(100\%)}{c_{\text{in,Glc}} \cdot D}$$

$$= 2 \cdot \frac{v_{\text{in,O}_2,100\%}}{c_{\text{in,Glc}} \cdot D},$$

resulting in a value of 5.42.
